# Supplementary material for: Seasonal assessment and characterization of microplastics in two urban (Balu) and peri-urban (Shitalakshya) rivers of Bangladesh
Source: Royal Society of Chemistry journal article supplement (doi:10.1039/d5ra05599g), 2025-01-01
Supplement: d5ra05599g1.pdf [file d5ra05599g1.pdf]

### Supplementary Information

Seasonal assessment and characterization of microplastics in two urban (Balu) and peri-urban (Shitalakshya) rivers of Bangladesh

Vaskur Kanti Roy<sup>1,¥</sup>, Md Numaer Tahnun<sup>1,2,¥</sup>, Hridoy Roy<sup>1,¥</sup>, Rumana Afrin<sup>3</sup>, Md. Shahinoor Islam<sup>1,#</sup> and Md. Mujibur Rahman<sup>3,\*</sup>

1. Department of Chemical Engineering, Bangladesh University of Engineering and Technology, Dhaka-1000, Bangladesh
2. Department of Chemical and Environmental Engineering, University of California, Riverside, CA 92507, United States
3. Department of Civil Engineering, United International University (UIU), Madani Avenue, Badda, Dhaka, 1212, Bangladesh

¥: Equal Contributions

Corresponding authors:

#Md. Shahinoor Islam ([shahinoorislam@che.buet.ac.bd](mailto:shahinoorislam@che.buet.ac.bd))

\*Md. Mujibur Rahman ([mujibur@ce.uiu.ac.bd](mailto:mujibur@ce.uiu.ac.bd))

Table S1 Site selection module

| Site no | River        | Sampling sites                           | Site code | Major pollution sources                                              | Latitude   | Longitude  |
|---------|--------------|------------------------------------------|-----------|----------------------------------------------------------------------|------------|------------|
| 1       | Balu         | Balu Bridge, 300 ft                      | BL1       | Local bazars, restaurants, and industries (Ready mix cement factory) | 23.834295  | 90.478048  |
| 2       |              | LGED Bridge, Jolshiri                    | BL2       | Industrial zone and residential zone                                 | 23.816141  | 90.48583   |
| 3       |              | Beraid Boat Ghat                         | BL3       | Bazar, boat jetty, residential and industrial zone.                  | 23.803583  | 90.483178  |
| 4       |              | Edarkandi-Fakirkhali Road                | BL4       | Residential area, poultry farms, and dairy farms                     | 23.7782864 | 90.4760599 |
| 5       |              | Eastern Straw Board                      | BL5       | Paper mills and residential area                                     | 23.754917  | 90.488611  |
| 6       |              | Rajakhali Ghat, Demra                    | BL6       | Agro farms, electronic market, and residential area.                 | 23.7358887 | 90.4916777 |
| 1       | Shitalakshya | Kholapara-Ghorashal Kheyaghat, Ghorashal | SL1       | Painting and chemical industries and industrial discharge            | 23.940269  | 90.6175277 |
| 2       |              | Kaliganj Kazir Char                      | SL2       | newly developing AK Khan economic zone,                              | 23.9165061 | 90.5659873 |

|          |                                   |            |                                                                                                                                             |           |           |
|----------|-----------------------------------|------------|---------------------------------------------------------------------------------------------------------------------------------------------|-----------|-----------|
|          |                                   |            | cotton mill,<br>Hameen industrial<br>park.                                                                                                  |           |           |
|          |                                   |            | brick<br>manufacturing<br>industry,<br>residential area,<br>etc.                                                                            |           |           |
| <b>3</b> | Beldi Bazar                       | <b>SL3</b> |                                                                                                                                             | 23.866084 | 90.55454  |
|          |                                   |            |                                                                                                                                             |           |           |
| <b>4</b> | Hatabo<br>Bazar,<br>Rupganj       | <b>SL4</b> | paper mills,<br>dockyard, jetty and<br>residential area.                                                                                    | 23.808758 | 90.54234  |
|          |                                   |            |                                                                                                                                             |           |           |
| <b>5</b> | Habib<br>Ghat,<br>Boralu<br>Bazar | <b>SL5</b> | Industrial zone,<br>several paper<br>mills, food<br>industries,<br>chemical<br>warehouse.                                                   | 23.762157 | 90.509764 |
|          |                                   |            |                                                                                                                                             |           |           |
| <b>6</b> | South<br>Rupshi<br>Mosjid<br>Ghat | <b>SL6</b> | public market<br>with small waste<br>dumps, weaving<br>factory, clothing<br>industry, textile<br>mills, residential<br>area, and jetty etc. | 23.732362 | 90.508041 |

Table S2 Quantification of Microplastics in the Balu and the Shitalakshya Rivers for water and sediment samples in the dry season.

| Sampling Point | The Balu River |            | The Shitalakshya River |          |
|----------------|----------------|------------|------------------------|----------|
|                | Water          | Sediment   | Water                  | Sediment |
|                | MP/L           | MP/kg      | MP/L                   | MP/kg    |
| <b>1</b>       | 3.97±0.159     | 10665±1664 | 4.13±0.248             | 4100±451 |
| <b>2</b>       | 6.29±0.440     | 4905±481   | 4.18±0.334             | 4595±483 |
| <b>3</b>       | 5.39±0.126     | 6955±1085  | 4.04±0.121             | 4295±387 |
| <b>4</b>       | 4.06±0.230     | 4155±327   | 4.28±0.086             | 3825±306 |
| <b>5</b>       | 3.34±0.401     | 3915±568   | 4.00±0.420             | 3485±303 |
| <b>6</b>       | 4.77±0.471     | 3445±448   | 3.5±0.235              | 3065±399 |

Table S3 Quantification of Microplastics in the Balu and the Shitalakshya Rivers for water and sediment samples in the wet season.

| Sampling Point | The Balu River |           | The Shitalakshya River |          |
|----------------|----------------|-----------|------------------------|----------|
|                | Water          | Sediment  | Water                  | Sediment |
|                | MP/L           | MP/kg     | MP/L                   | MP/kg    |
| <b>1</b>       | 1.760±0.211    | 1410±113  | 6.72±0.739             | 2850±381 |
| <b>2</b>       | 3.400±0.238    | 2850±428  | 2.77±0.249             | 2130±185 |
| <b>3</b>       | 5.110±0.588    | 515±16    | 6.09±0.852             | 2020±197 |
| <b>4</b>       | 3.770±0.189    | 2905±204  | 2.47±0.494             | 875±52   |
| <b>5</b>       | 3.120±0.237    | 3275±148  | 5.98±0.478             | 3275±255 |
| <b>6</b>       | 6.360±0.356    | 9675±1064 | 3.87±0.561             | 4880±654 |

Table S4 PLI values of sediment samples and water samples in the Shitalakshya River across both seasons.

| Sampling Point | Sediment Samples ( $C_o = 875$ ) |          |      |            |          |      | Water Samples ( $C_o = 2$ ) |          |      |            |          |      |
|----------------|----------------------------------|----------|------|------------|----------|------|-----------------------------|----------|------|------------|----------|------|
|                | Wet Season                       |          |      | Dry season |          |      | Wet Season                  |          |      | Dry season |          |      |
|                | $C_i$                            | $C_{fi}$ | PLI  | $C_i$      | $C_{fi}$ | PLI  | $C_i$                       | $C_{fi}$ | PLI  | $C_i$      | $C_{fi}$ | PLI  |
| SL-1           | 2850                             | 3.3      | 1.80 | 4100       | 4.67     | 2.17 | 7                           | 3.5      | 1.87 | 4.13       | 2.07     | 1.44 |
| SL-2           | 2130                             | 2        | 1.6  | 4595       | 5.25     | 2.29 | 3                           | 1.5      | 1.25 | 4.18       | 2.09     | 1.45 |
| SL-3           | 2020                             | 2        | 1.5  | 4295       | 4.91     | 2.22 | 6                           | 3        | 1.73 | 4.04       | 2.02     | 1.42 |
| SL-4           | 875                              | 1        | 1    | 3825       | 4.37     | 2.09 | 2                           | 1        | 1    | 4.28       | 2.14     | 1.46 |
| SL-5           | 3275                             | 4        | 1.9  | 3485       | 3.98     | 1.99 | 6                           | 3        | 1.73 | 4          | 2        | 1.41 |
| SL-6           | 4880                             | 6        | 2.4  | 3065       | 3.50     | 1.87 | 4                           | 2        | 1.41 | 3.5        | 1.75     | 1.32 |
|                | $PLI_s$                          |          | 1.64 | $PLI_s$    |          | 1.89 | $PLI_w$                     |          | 1.46 | $PLI_w$    |          | 1.35 |

Table S5 PLI values of sediment samples and water samples in the Balu River across both seasons.

| Sampling Point | Sediment Samples ( $C_o = 515$ ) |          |      |            |          |      | Water Samples ( $C_o = 2$ ) |          |      |            |          |      |
|----------------|----------------------------------|----------|------|------------|----------|------|-----------------------------|----------|------|------------|----------|------|
|                | Wet Season                       |          |      | Dry season |          |      | Wet Season                  |          |      | Dry season |          |      |
|                | $C_i$                            | $C_{fi}$ | PLI  | $C_i$      | $C_{fi}$ | PLI  | $C_i$                       | $C_{fi}$ | PLI  | $C_i$      | $C_{fi}$ | PLI  |
| BL-1           | 1410                             | 2.75     | 1.66 | 10665      | 20.71    | 4.55 | 2                           | 1        | 1    | 3.97       | 1.98     | 1.41 |
| BL-2           | 2850                             | 5.53     | 2.35 | 4905       | 9.52     | 3.08 | 3                           | 1.5      | 1.22 | 6.29       | 3.14     | 1.77 |
| BL-3           | 515                              | 1        | 1    | 6955       | 13.50    | 3.67 | 5                           | 2.5      | 1.58 | 5.39       | 2.69     | 1.64 |
| BL-4           | 4865                             | 9.45     | 3.07 | 4155       | 8.07     | 2.84 | 4                           | 2        | 1.41 | 4.06       | 2.03     | 1.42 |
| BL-5           | 3275                             | 6.36     | 2.52 | 3915       | 7.60     | 2.76 | 3                           | 1.5      | 1.22 | 3.34       | 1.67     | 1.29 |
| BL-6           | 9675                             | 18.79    | 4.33 | 3445       | 6.69     | 2.59 | 6                           | 3        | 1.73 | 4.77       | 2.38     | 1.54 |
|                | $PLI_s$                          |          | 2.25 | $PLI_s$    |          | 3.19 | $PLI_w$                     |          | 1.34 | $PLI_w$    |          | 1.35 |

Table S6 Risk level criteria for microplastic pollution.

| Value of the pollution load index (PLI) | <10 | 10-20 | 20-30 | >30 |
|-----------------------------------------|-----|-------|-------|-----|
| Risk category                           | I   | II    | III   | IV  |

Table S7 Pearson's correlation analysis between microplastic (MP) abundances in water (MPs/L) and sediments (MPs/kg dry weight) across sampling sites in dry and wet seasons.

| Season | Pearson's r | p-value |
|--------|-------------|---------|
| Dry    | 0.16        | 0.61    |
| Wet    | 0.38        | 0.25    |

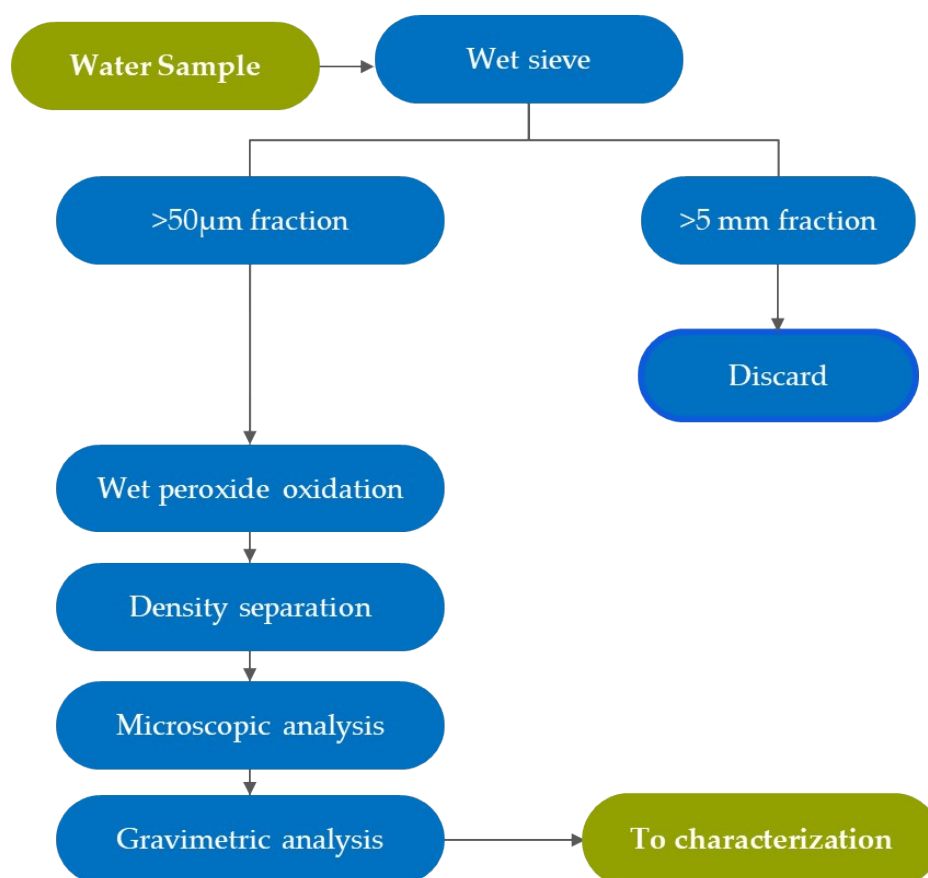

Figure S1 Block Diagram of Methods for Processing Water Samples

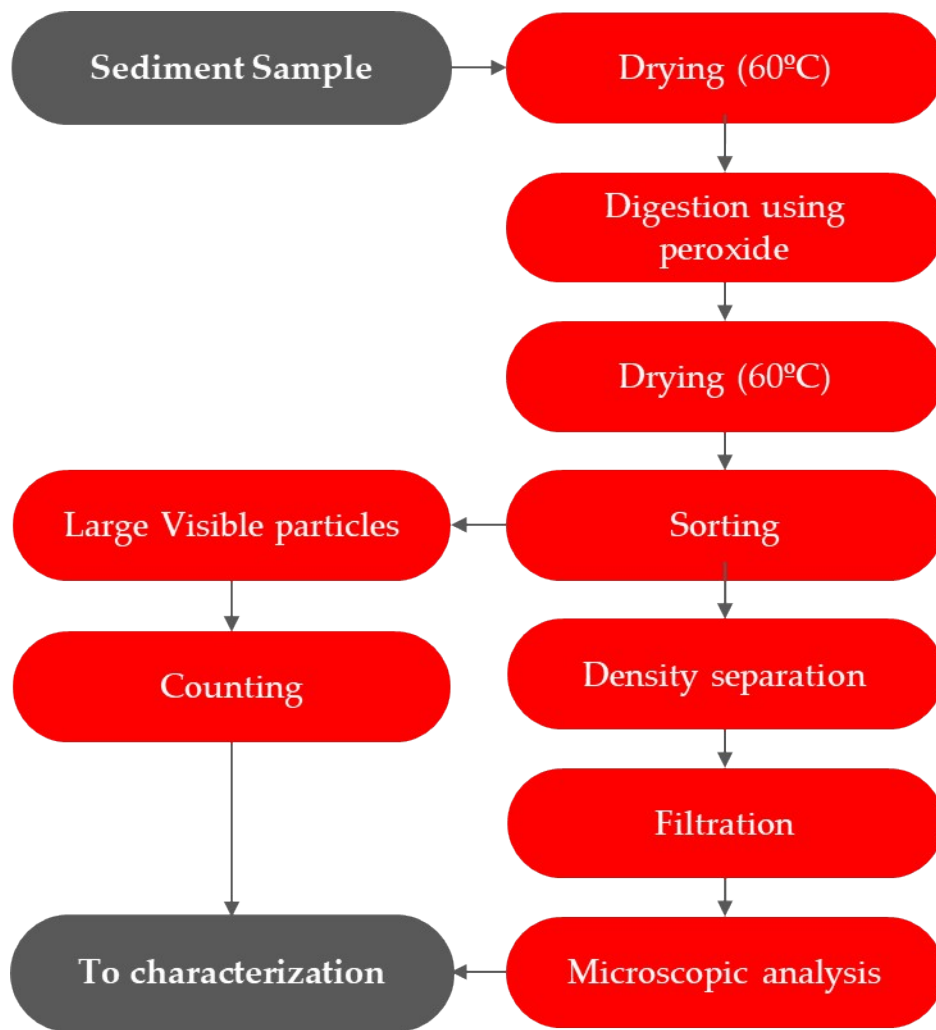

Figure S2 Block Diagram of Methods for Processing Sediment Samples

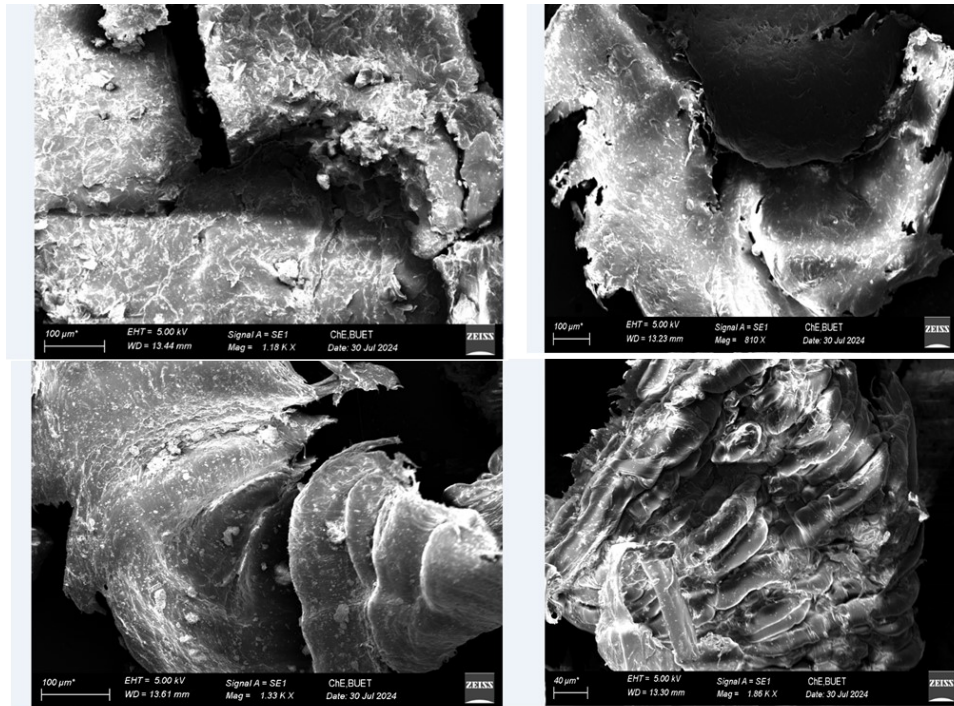

Figure S3 SEM Image of Balu-1 sediment

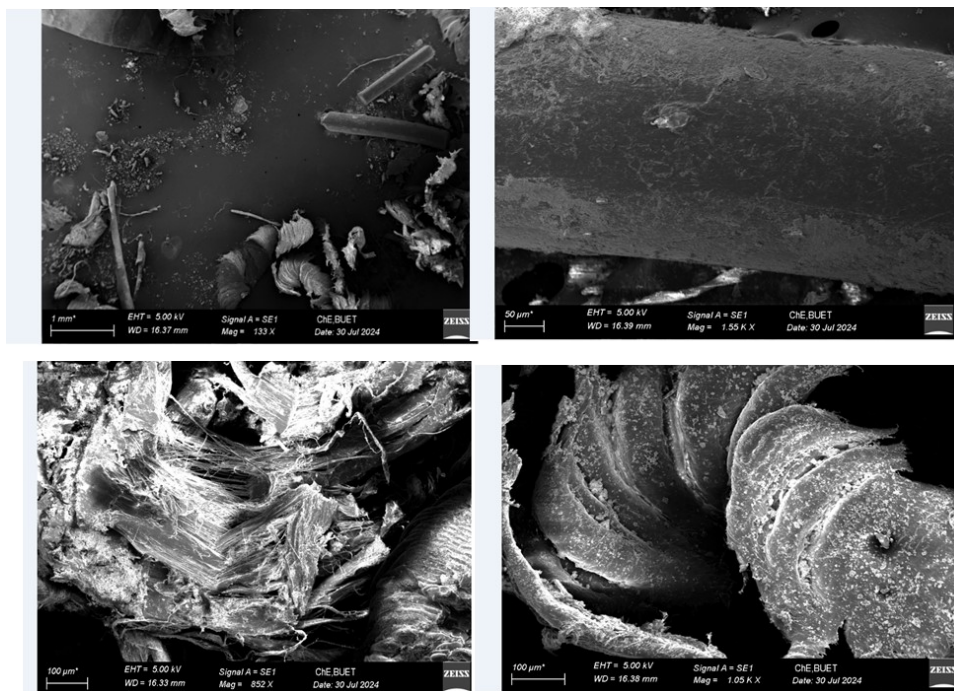

Figure S4 SEM Image of Balu-1 water



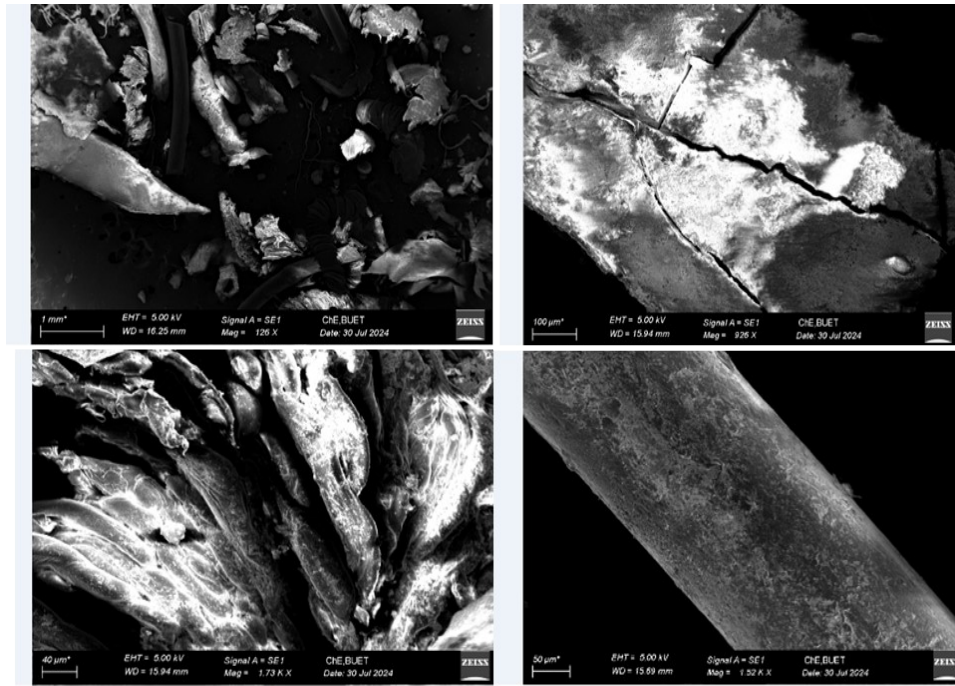

Figure S5 SEM Image of Balu-4 Sediment

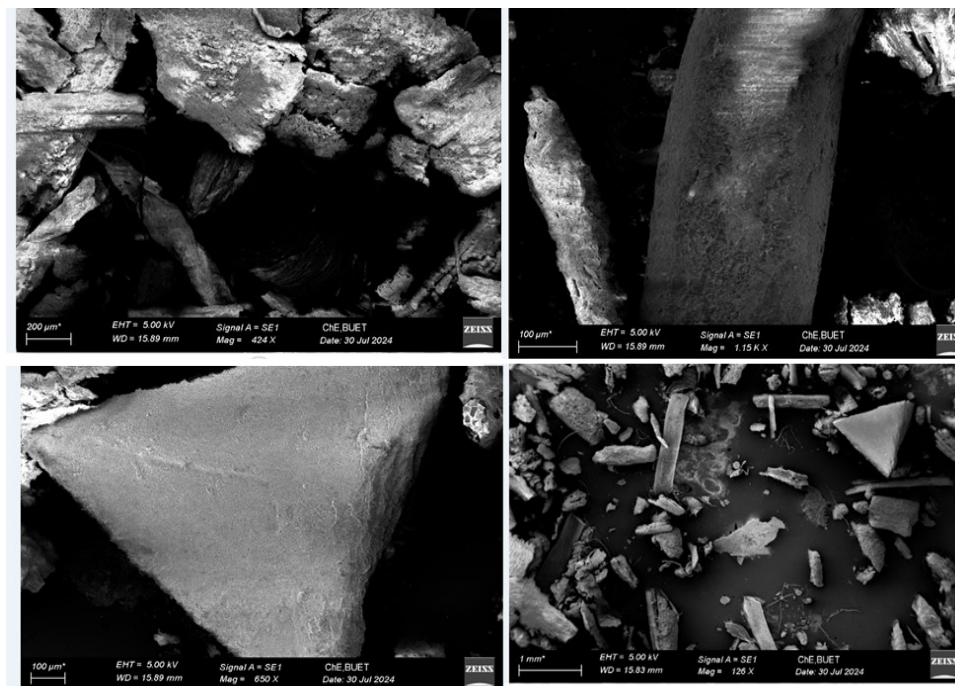

Figure S6 SEM Image of Balu-4 Water

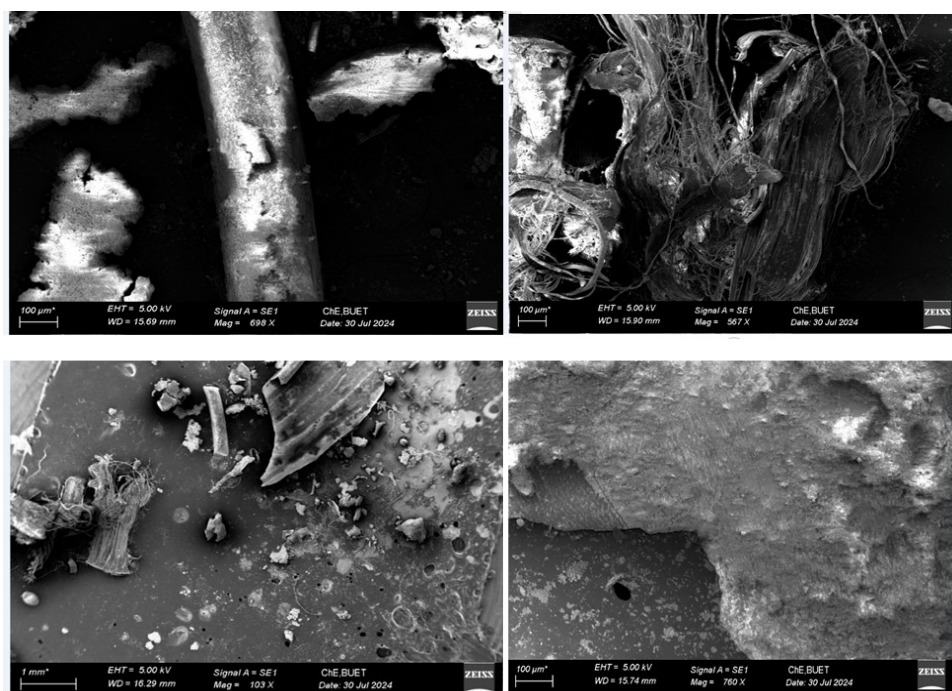

Figure S7 SEM Image of Shitalakshya-2 Water

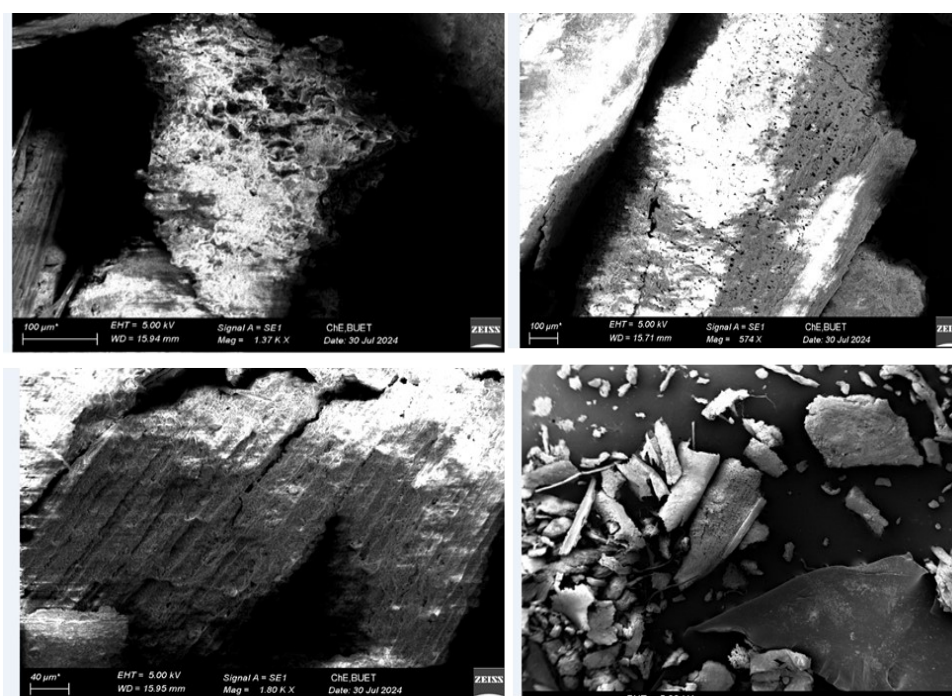

Figure S8 SEM Image of Shitalakshya-4 Sediment.



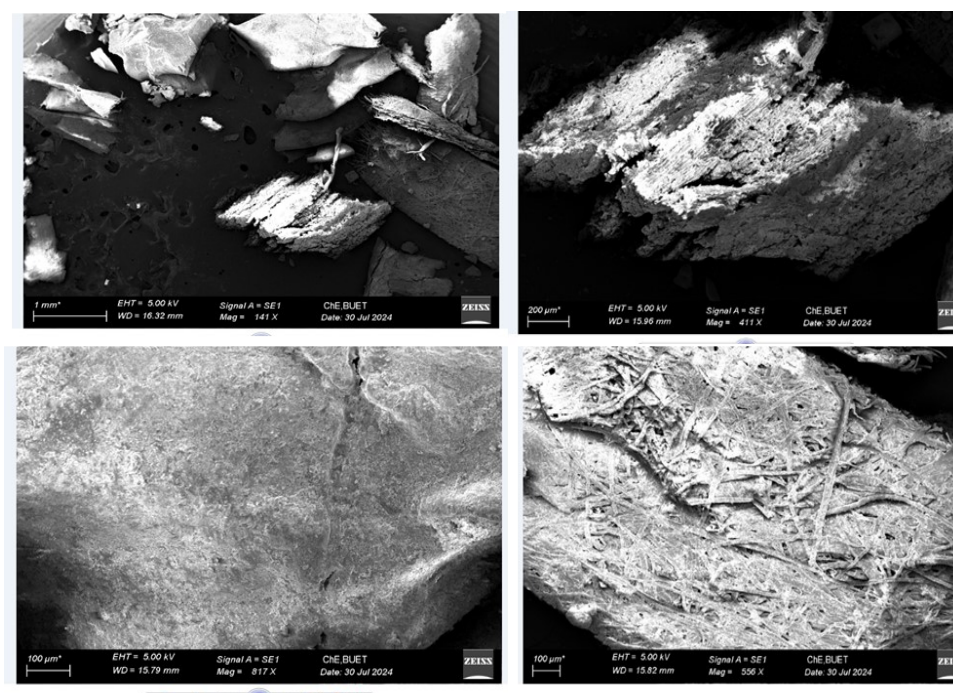

Figure S9 SEM Image of Shitalakshya-5 Sediment.

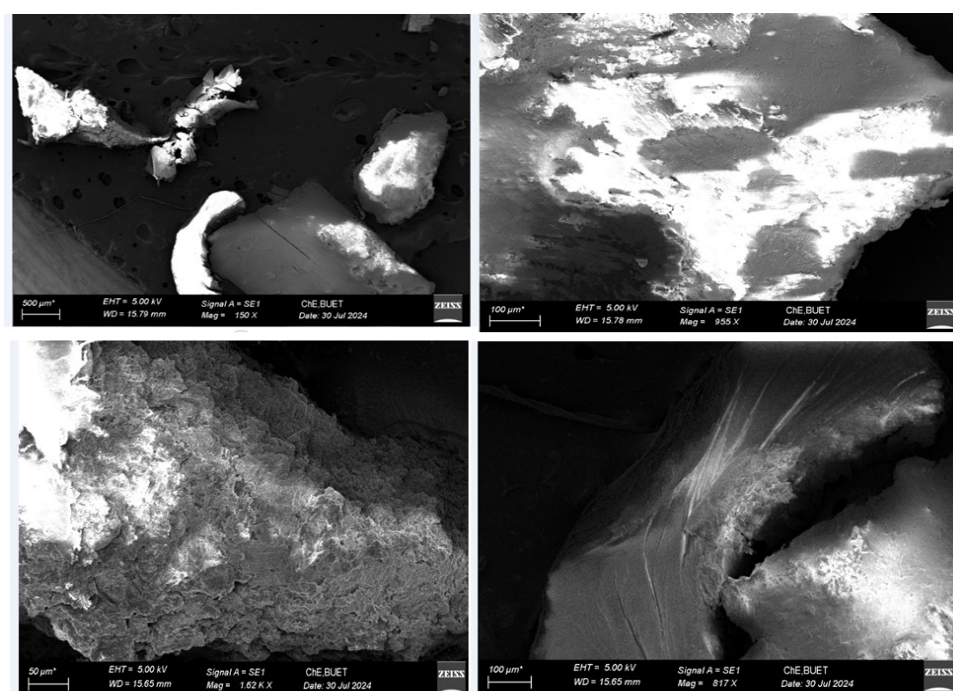

Figure S10 SEM Image of Shitalakshya-5 Water.

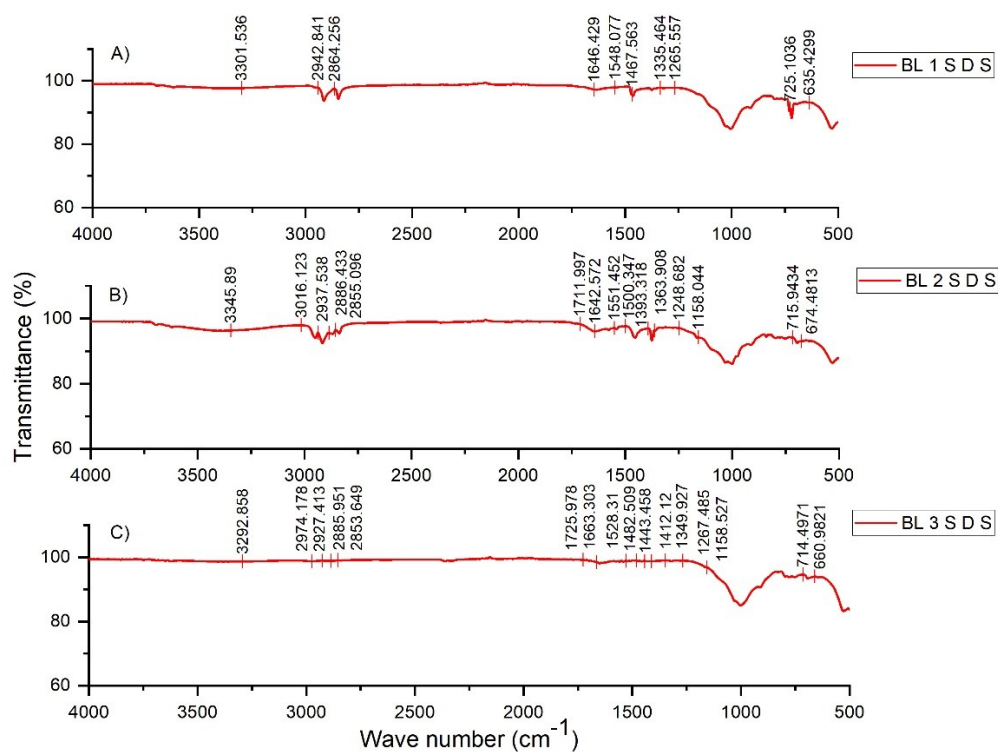

Figure S11 FTIR spectra of A) Balu-1, B) Balu-2, and C) Balu-3 sediment in the dry season.

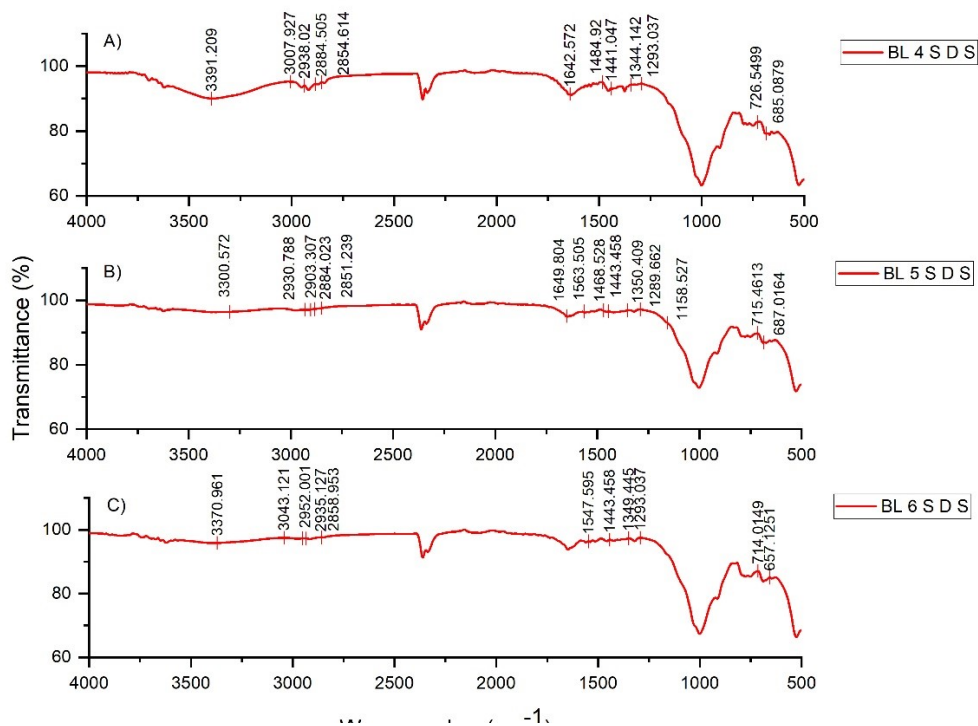

Figure S12 FTIR Spectra of A) Balu-4, B) Balu-5, and C) Balu-6 sediment in the dry season.

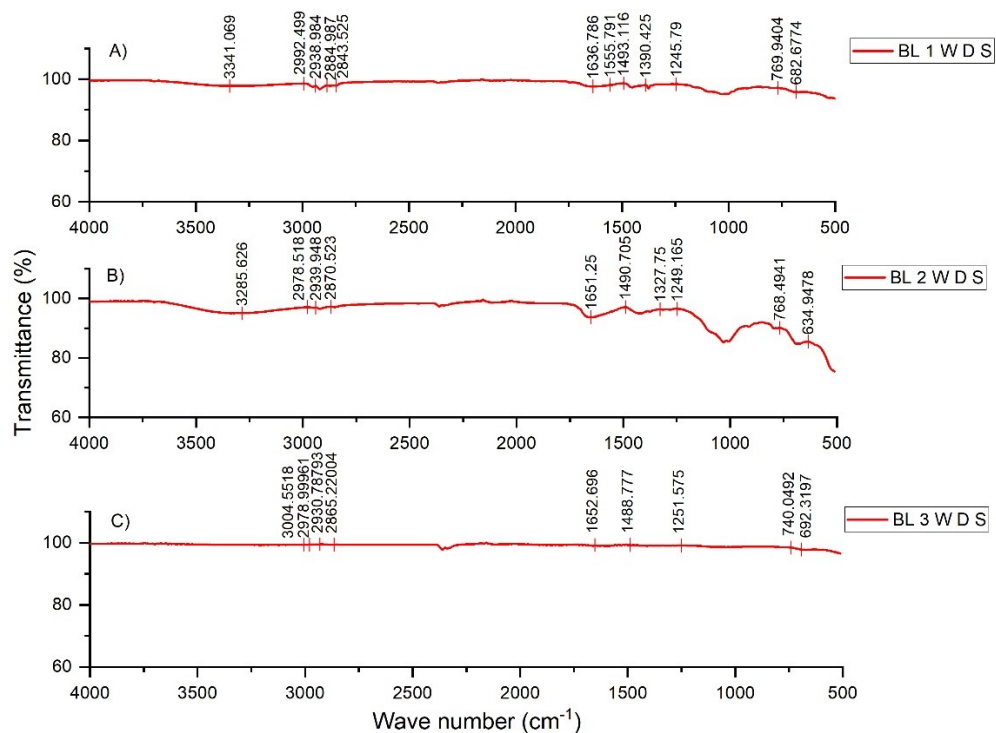

Figure S13 FTIR spectra of A) Balu-1, B) Balu-2, and C) Balu-3 water in the dry season.

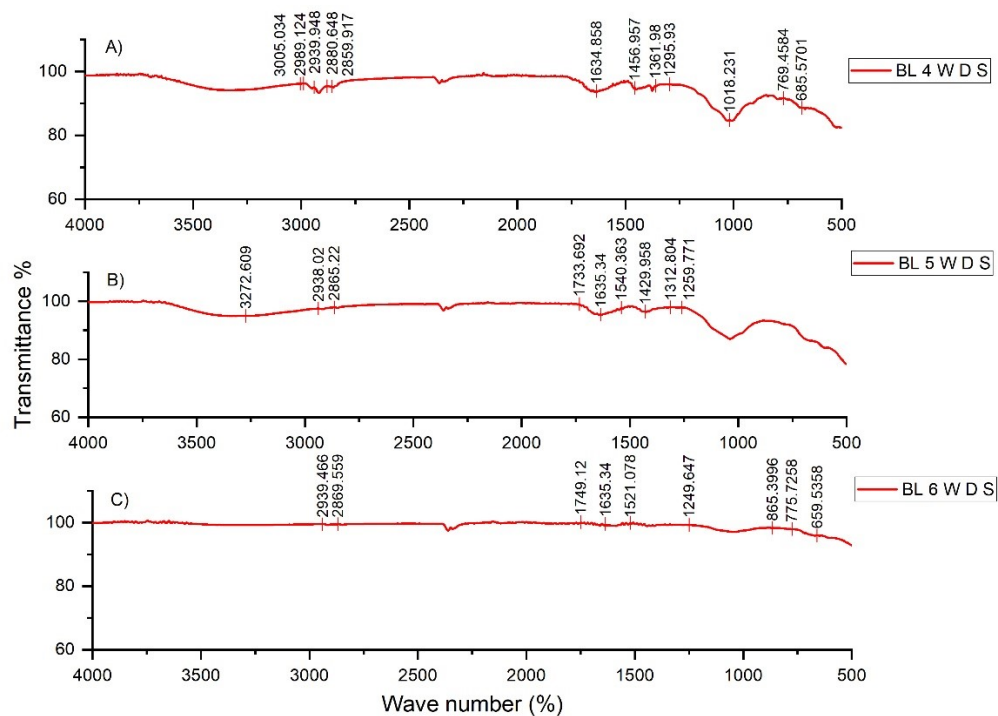

Figure S14 FTIR spectra of A) Balu-4, B) Balu-5 and C) Balu-6 water in the dry season.

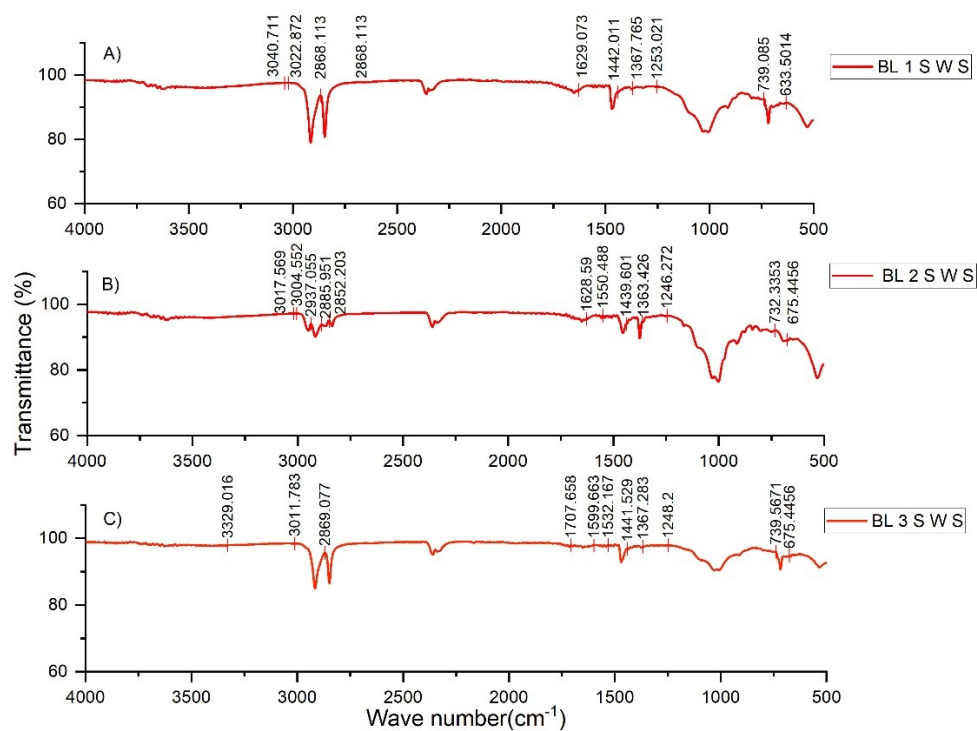

Figure S15 FTIR spectra of A) Balu-1, B) Balu-2, and C) Balu-3 sediment in the wet season.

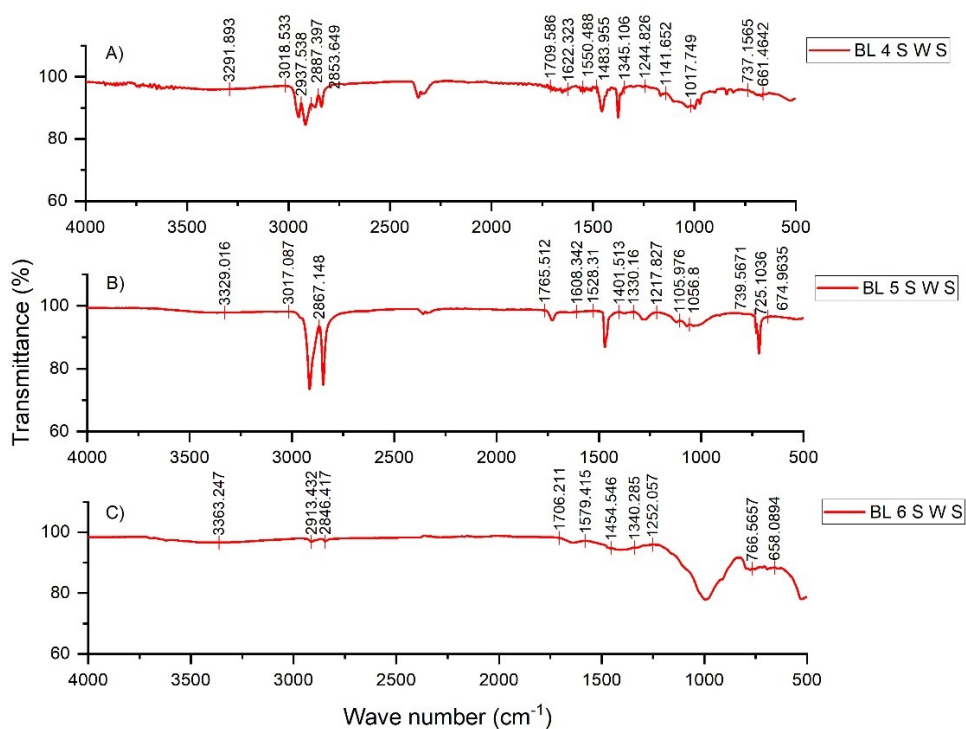

Figure S16 FTIR spectra of A) Balu-4, B) Balu-5, and C) Balu-6 sediment in the wet season



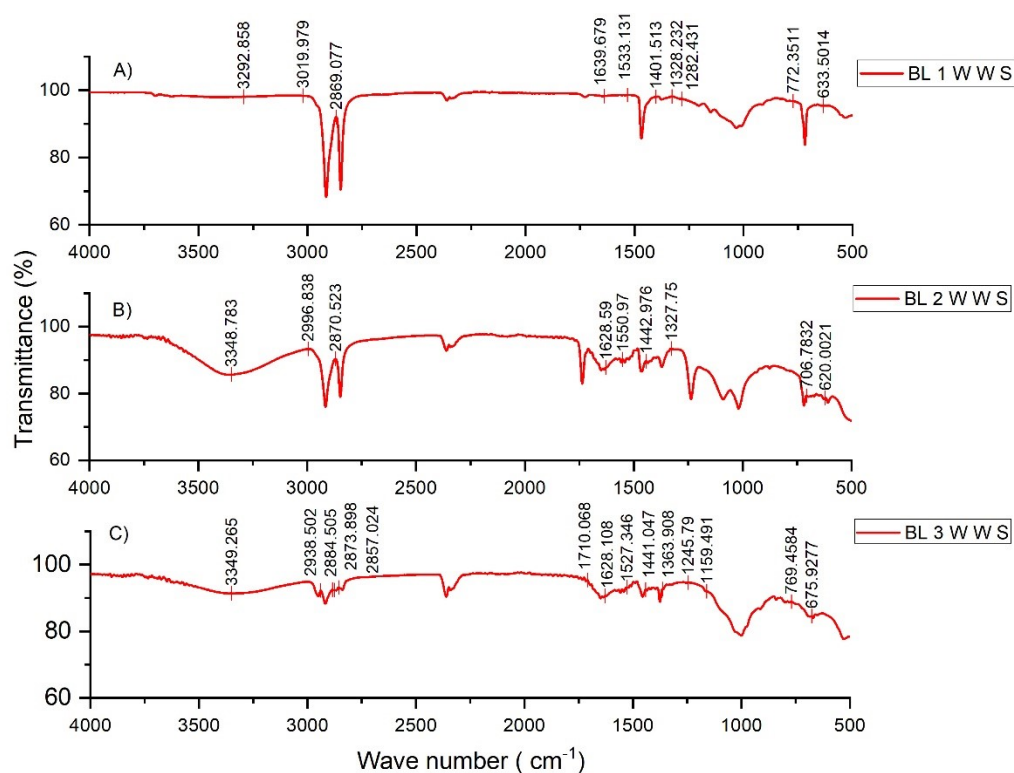

Figure S17 FTIR spectra of A) Balu-1, B) Balu-2, and C) Balu-3 water in the wet season.

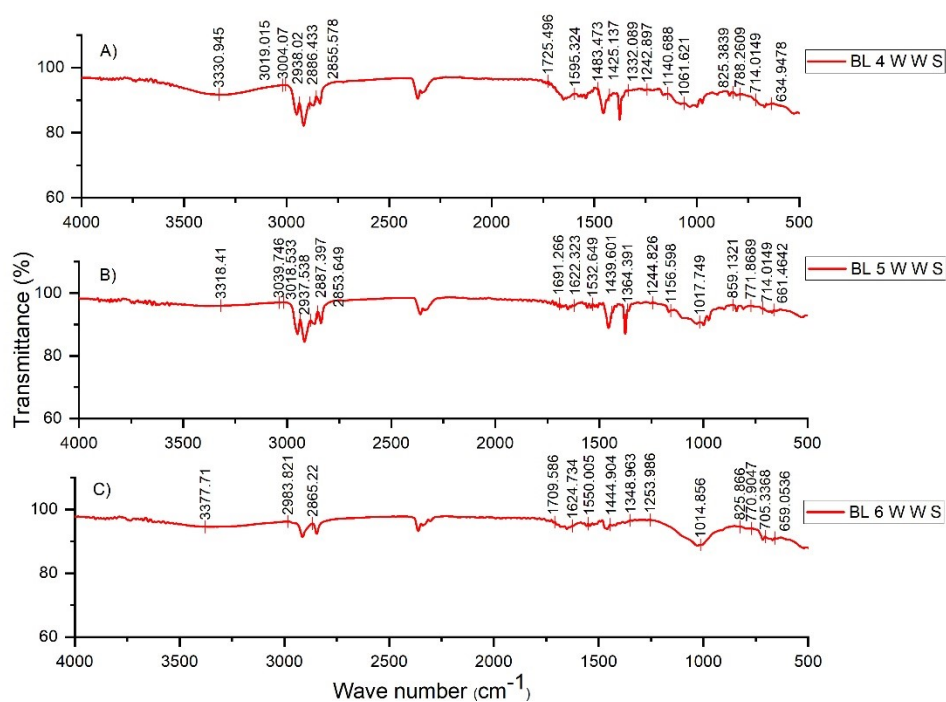

Figure S18 FTIR spectra of A) Balu-4, B) Balu-5, and C) Balu-6 water in the wet season

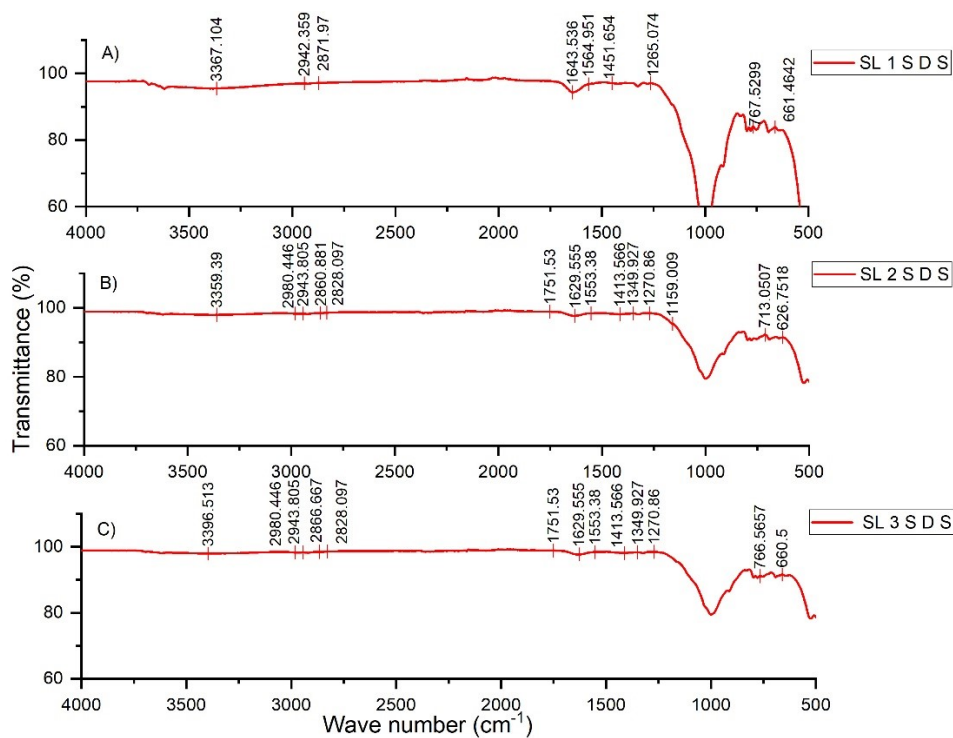

Figure S19 FTIR spectra of A) Shitalakshya-1, B) Shitalakshya -2, and C) Shitalakshya -3 sediment in the dry season.

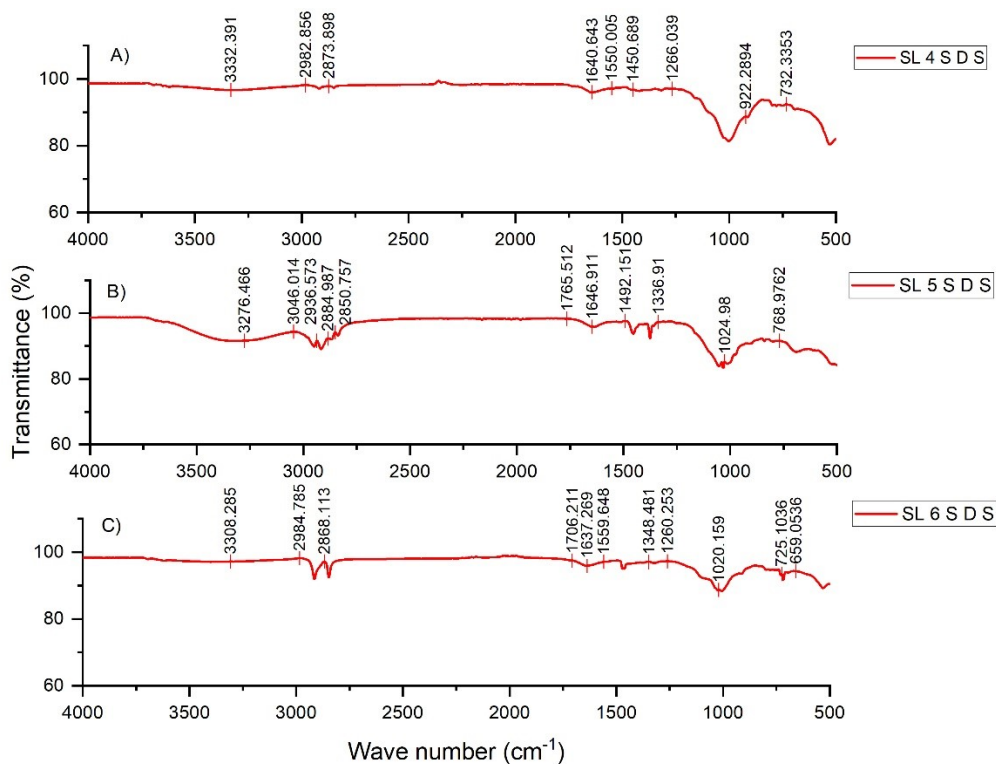

Figure S20 FTIR spectra of A) Shitalakshya-4, B) Shitalakshya-5, and C) Shitalakshya -6 sediment in the dry season.



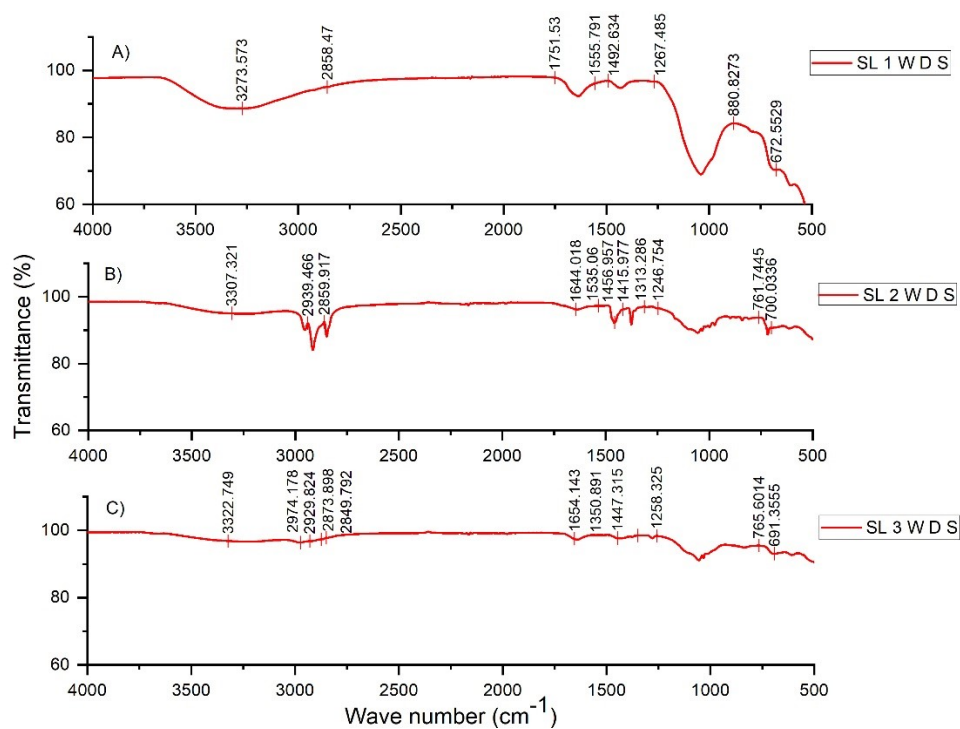

Figure S21 FTIR spectra of A) Shitalakshya-1, B) Shitalakshya -2, and C) Shitalakshya -3 water in the dry season.

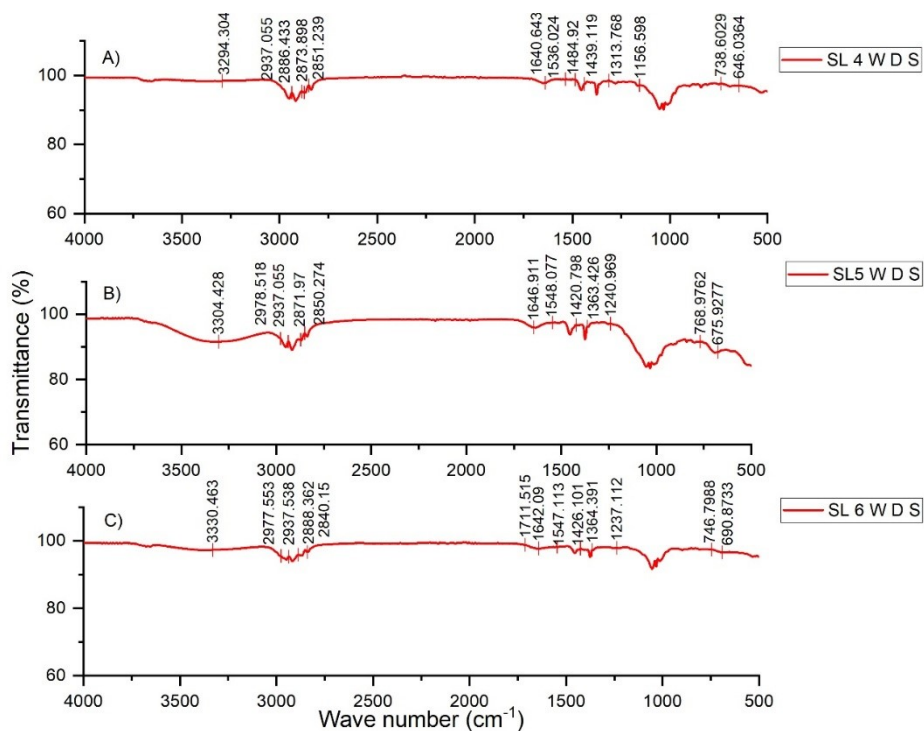

Figure S22 FTIR spectra of A) Shitalakshya-4, B) Shitalakshya -5, and C) Shitalakshya -6 water in the dry season.

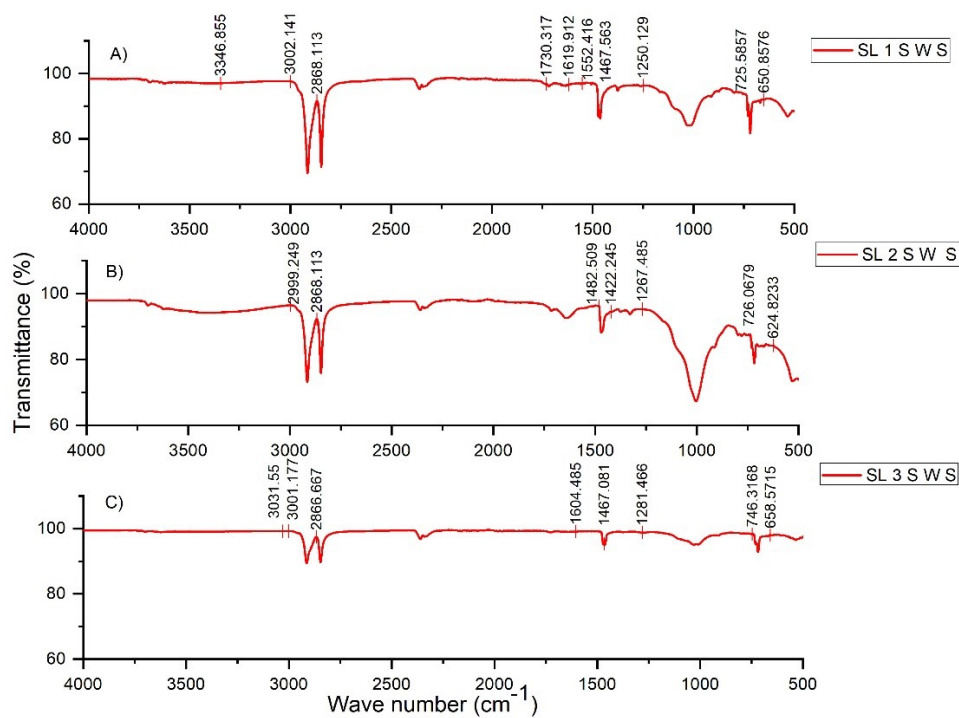

Figure S23 FTIR spectra of A) Shitalakshya-1, B) Shitalakshya -2, and C) Shitalakshya -3 sediment in the wet season.

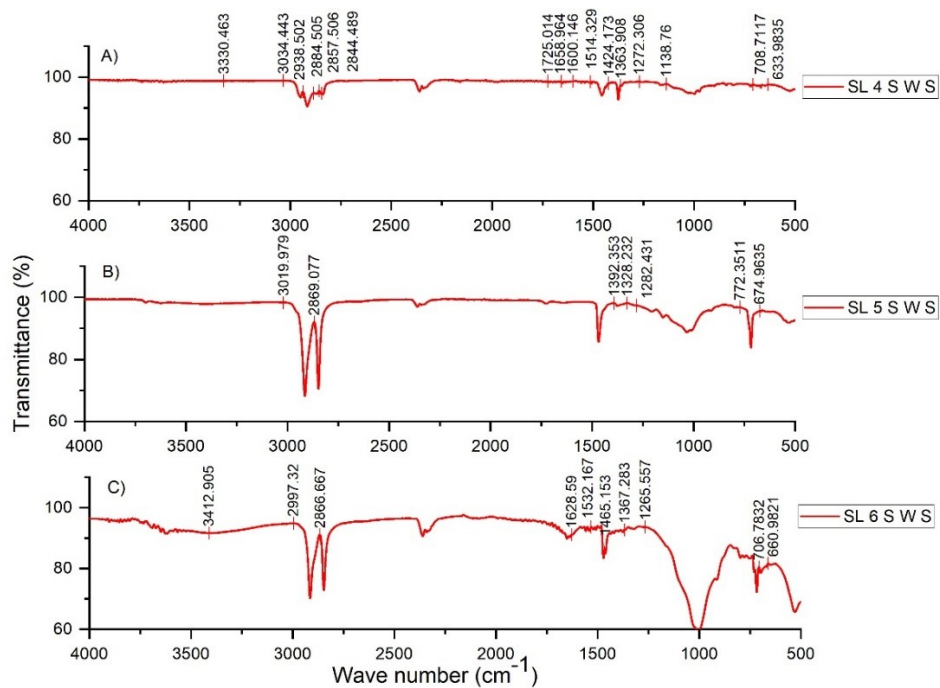

Figure S24 FTIR spectra of A) Shitalakshya-4, B) Shitalakshya -5, and C) Shitalakshya -6 sediment in the wet season.

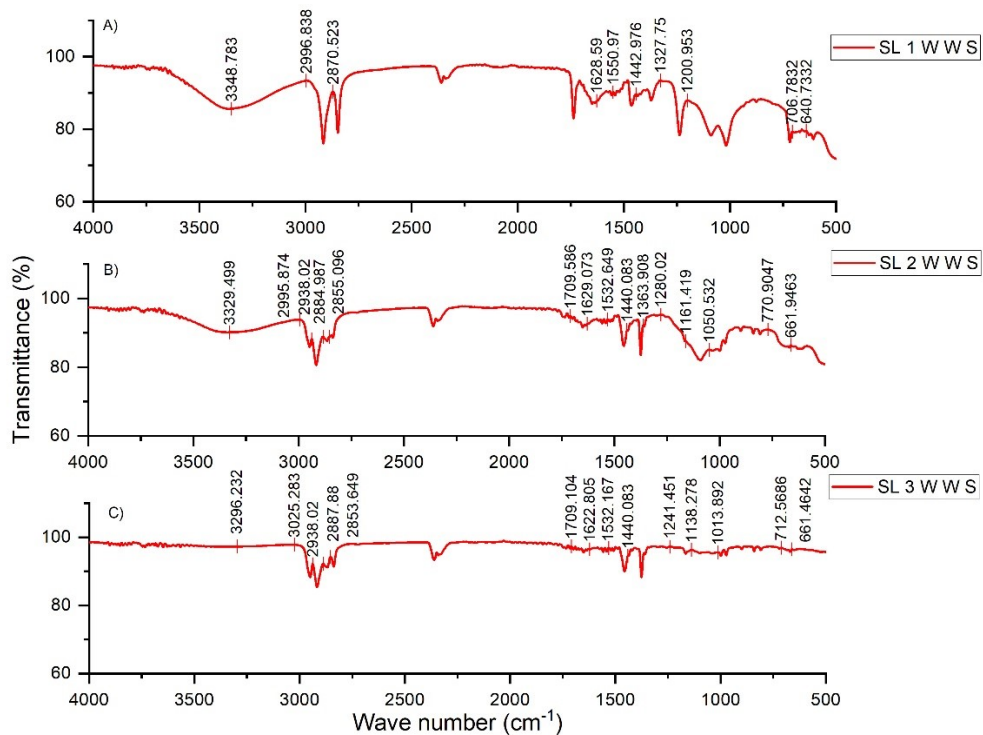

Figure S25 FTIR spectra of A) Shitalakshya-1, B) Shitalakshya -2, and C) Shitalakshya -3 water in the wet season.

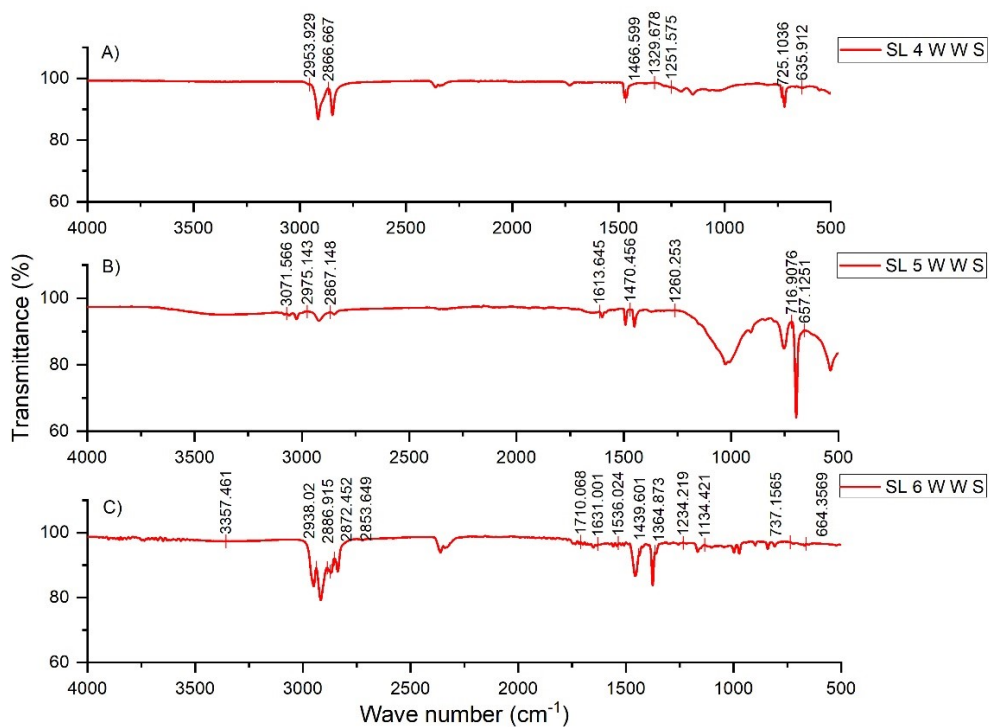

Figure S26 FTIR spectra of A) Shitalakshya-4, B) Shitalakshya -5, and C) Shitalakshya -6 water in the wet season.

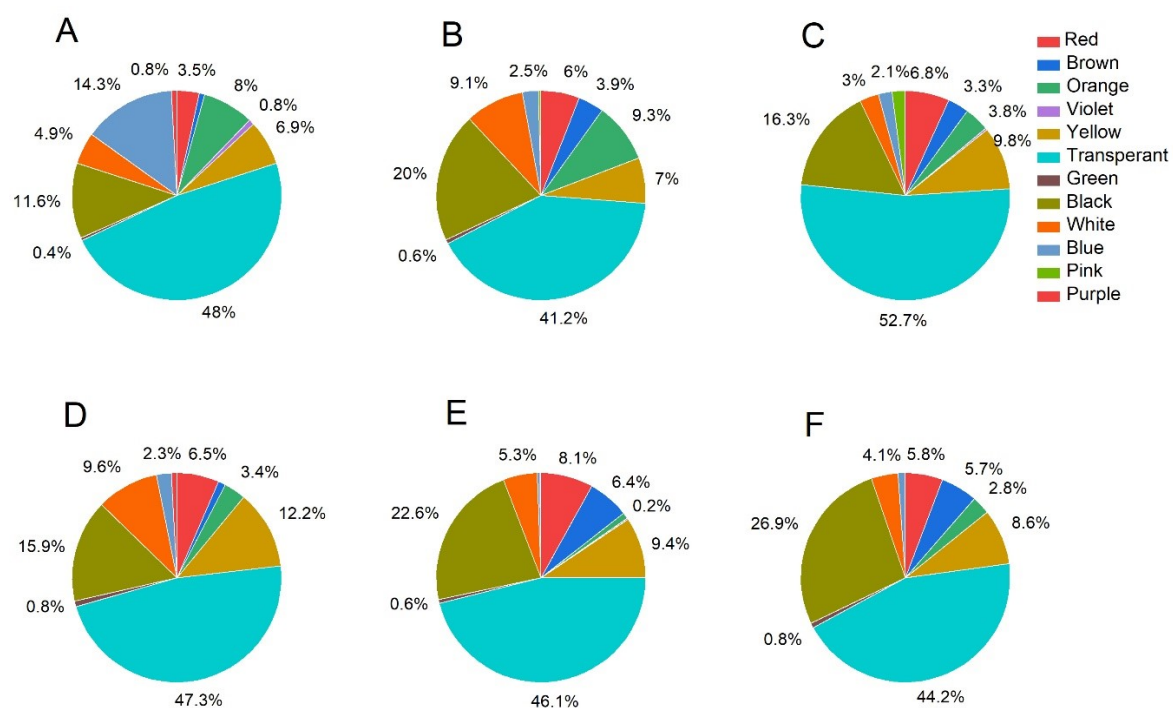

Figure S27 Color composition of MPs in The Shitalakshya river sediment samples in the dry season (A) SL-1; (B) SL-2; (C) SL-3; (D) SL-4 (E) SL-5 and (F) SL-6

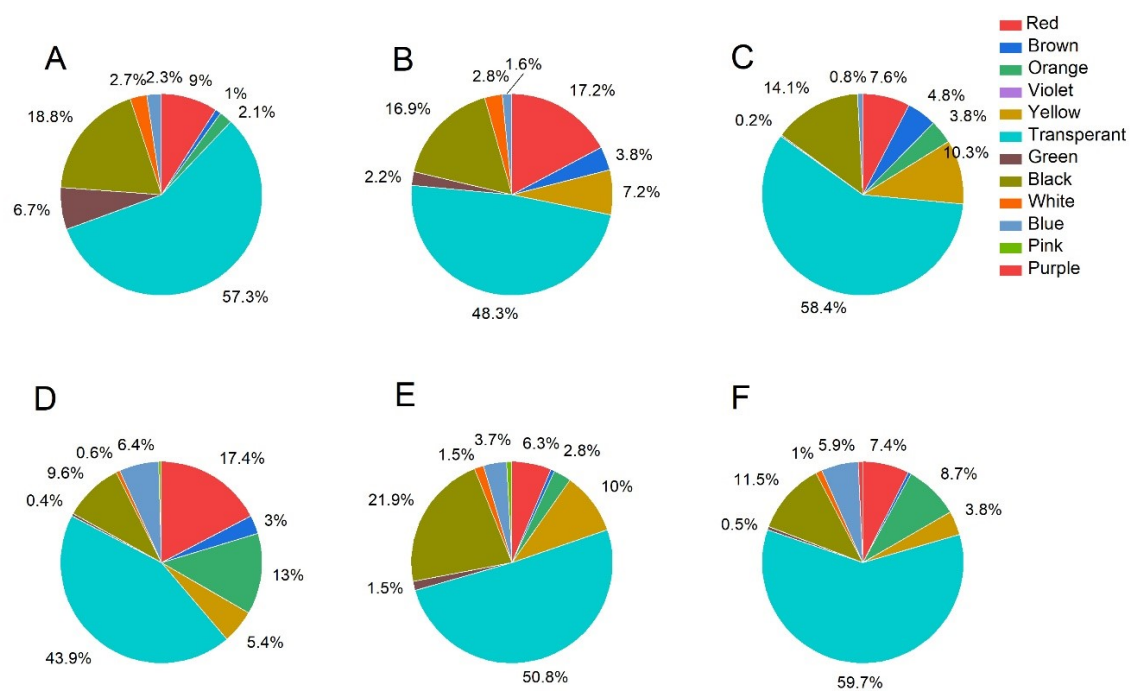

Figure S28 Color composition of MPs in The Shitalakshya river water samples in the dry season (A) SL-1; (B) SL-2; (C) SL-3; (D) SL-4 (E) SL-5 and (F) SL-6

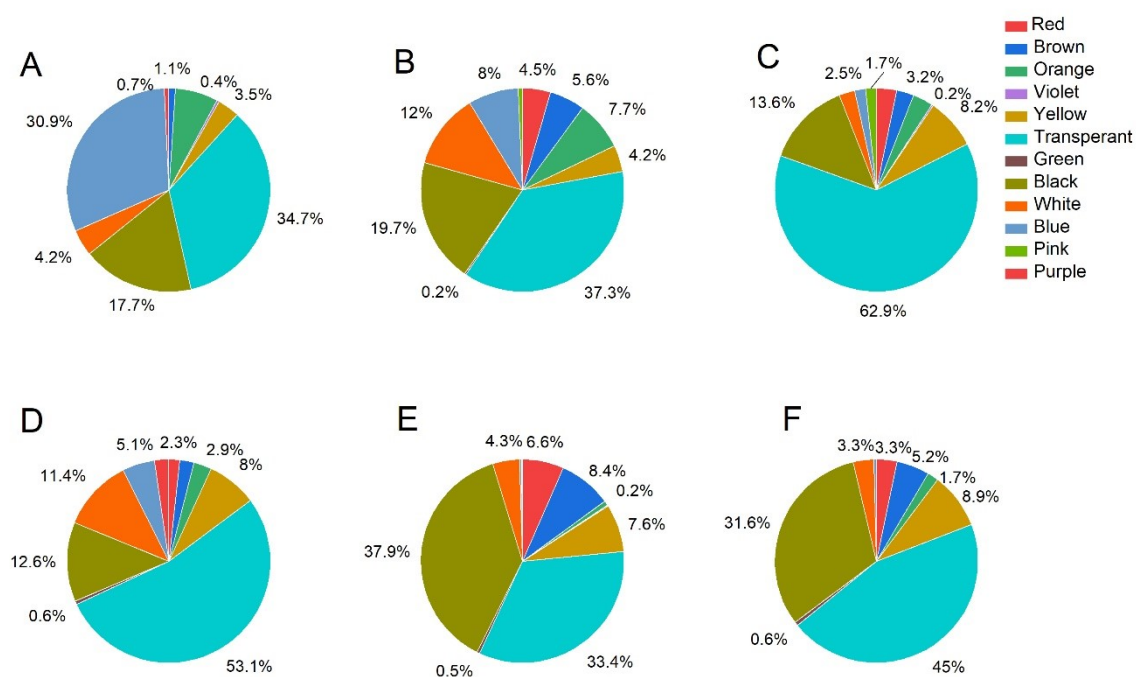

Figure S29 Color composition of MPs in The Shitalakshya river sediment samples in the wet season (A) SL-1; (B) SL-2; (C) SL-3; (D) SL-4 (E) SL-5 and (F) SL-6

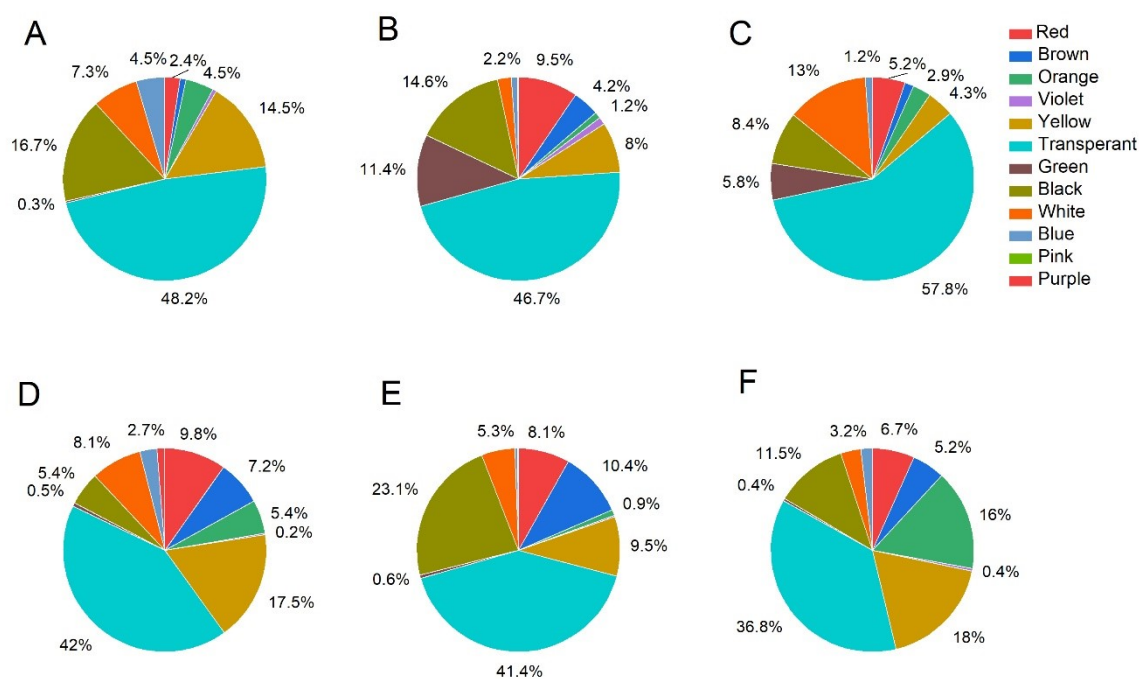

Figure S30 Color composition of MPs in the Balu River sediment samples in the dry season  
(A) BL-1; (B) BL-2; (C) BL-3; (D) BL-4, (E) BL-5 and (F) BL-6.

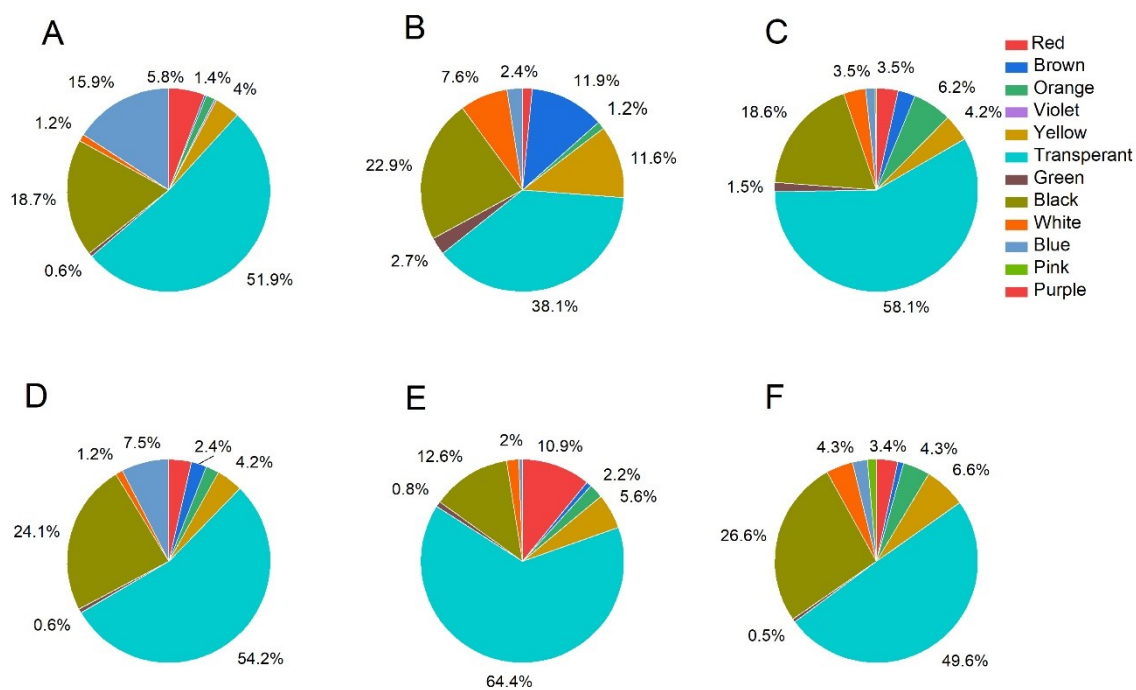

Figure S31 Color composition of MPs in the Balu River water samples in the dry season (A) BL-1; (B) BL-2; (C) BL-3; (D) BL-4, (E) BL-5 and (F) BL-6.



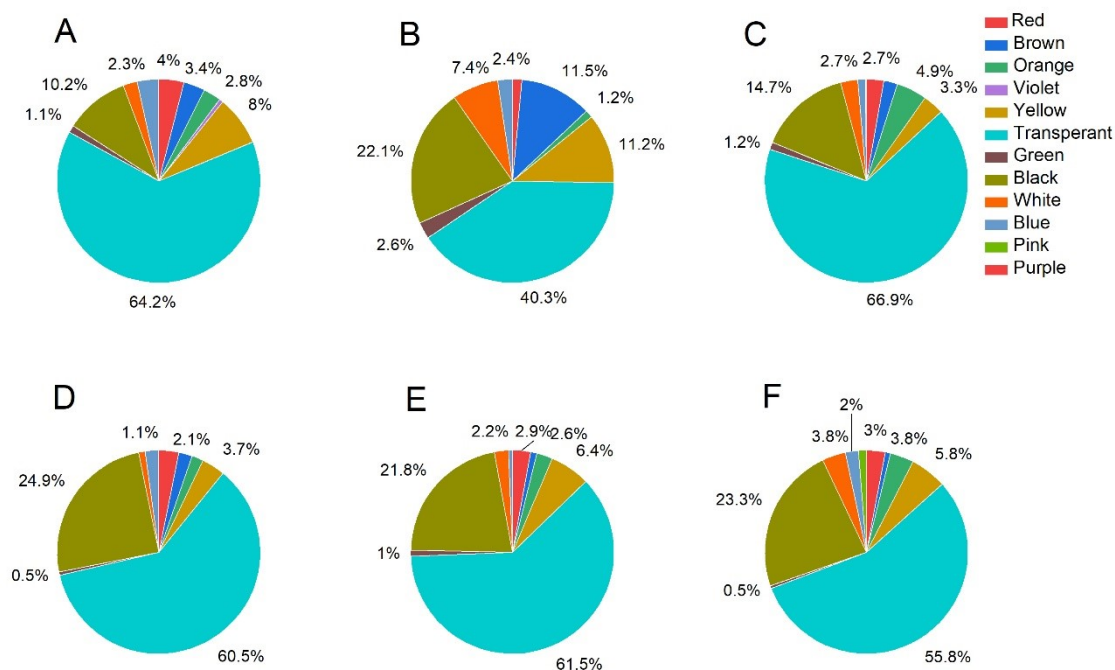

Figure S32 Color composition of MPs in the Balu River water samples in the wet season (A) BL-1; (B) BL-2; (C) BL-3; (D) BL-4, (E) BL-5 and (F) BL-6.

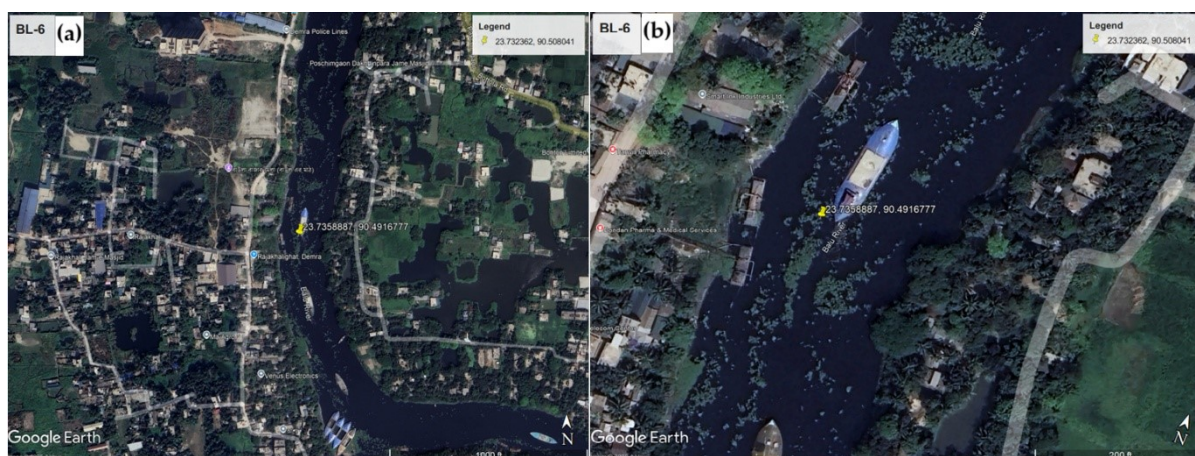

Figure S33 Land-use map of sampling site BL-6 prepared from Google Earth imagery, showing surrounding industrial clusters and local markets.

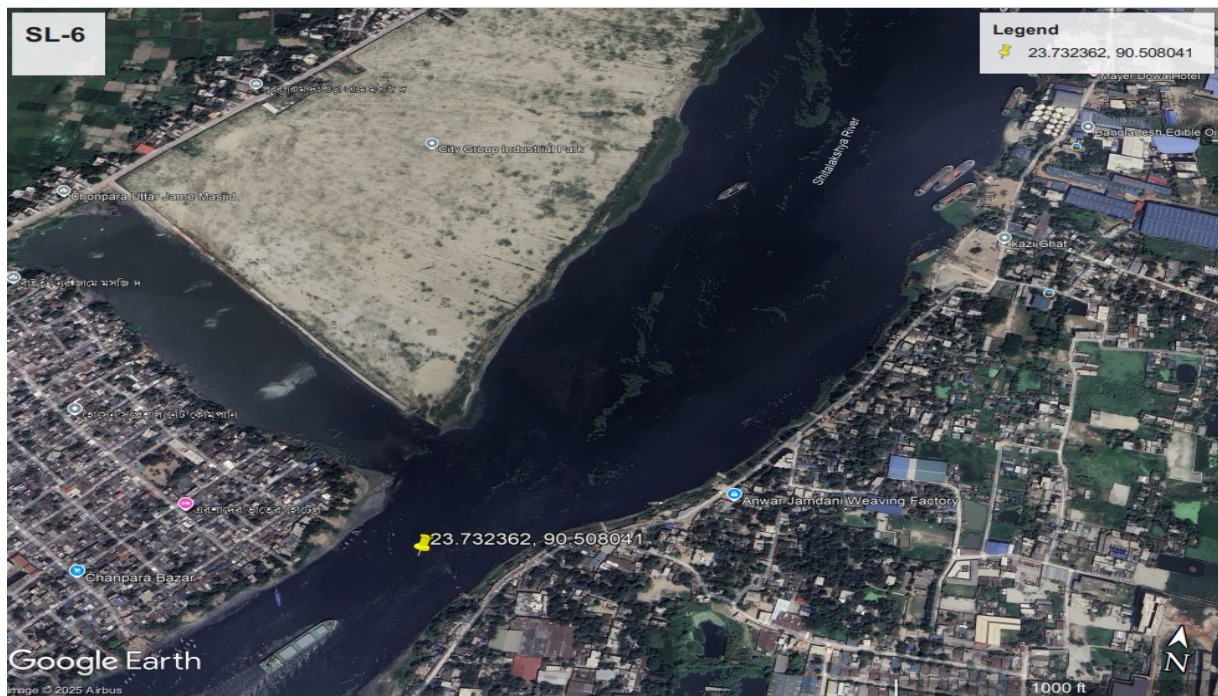

Figure S34 Land-use map of sampling site SL-6 prepared from Google Earth imagery, showing surrounding industrial clusters and local markets.

### **Data Availability**

The raw FTIR spectral data (.csv files) supporting this study have been deposited in the open-access repository **Zenodo** and are publicly available at:

<https://doi.org/10.5281/zenodo.17237954>
